# Supplementary material
Source: publisher site journal article supplement (https://www.dovepress.com/article/549589)
Supplement: Supplementary file 1 [file 549589.docx]

**Supplementary Materials**

**Cost-Effectiveness Analysis and Priority Setting in the Transition from Iron-Folic Acid (IFA) to Multiple Micronutrient Supplementation (MMS) for Pregnant Women in Indonesia**

Fitri Alfiani1,2, Auliasari Meita Utami3, Neily Zakiyah3,4, Nur Aizati Athirah Daud5, Auliya A Suwantika3,4,6, Irma Melyani Puspitasari3,4

1Doctoral Program in Pharmacy, Faculty of Pharmacy, Universitas Padjadjaran, Bandung, Indonesia;

2Faculty of Health Science, Universitas Muhammadiyah Cirebon, Cirebon, Indonesia;

3Center of Excellence for Pharmaceutical Care Innovation (PHARCI), Universitas Padjadjaran, Bandung, Indonesia;

4Department of Pharmacology and Clinical Pharmacy, Faculty of Pharmacy, Universitas Padjadjaran, Bandung, Indonesia;

5Discipline of Clinical Pharmacy, School of Pharmaceutical Sciences, Universiti Sains Malaysia, 11800 USM, Penang, Malaysia;

6Center for Health Technology Assessment, Universitas Padjadjaran, Bandung, Indonesia

**
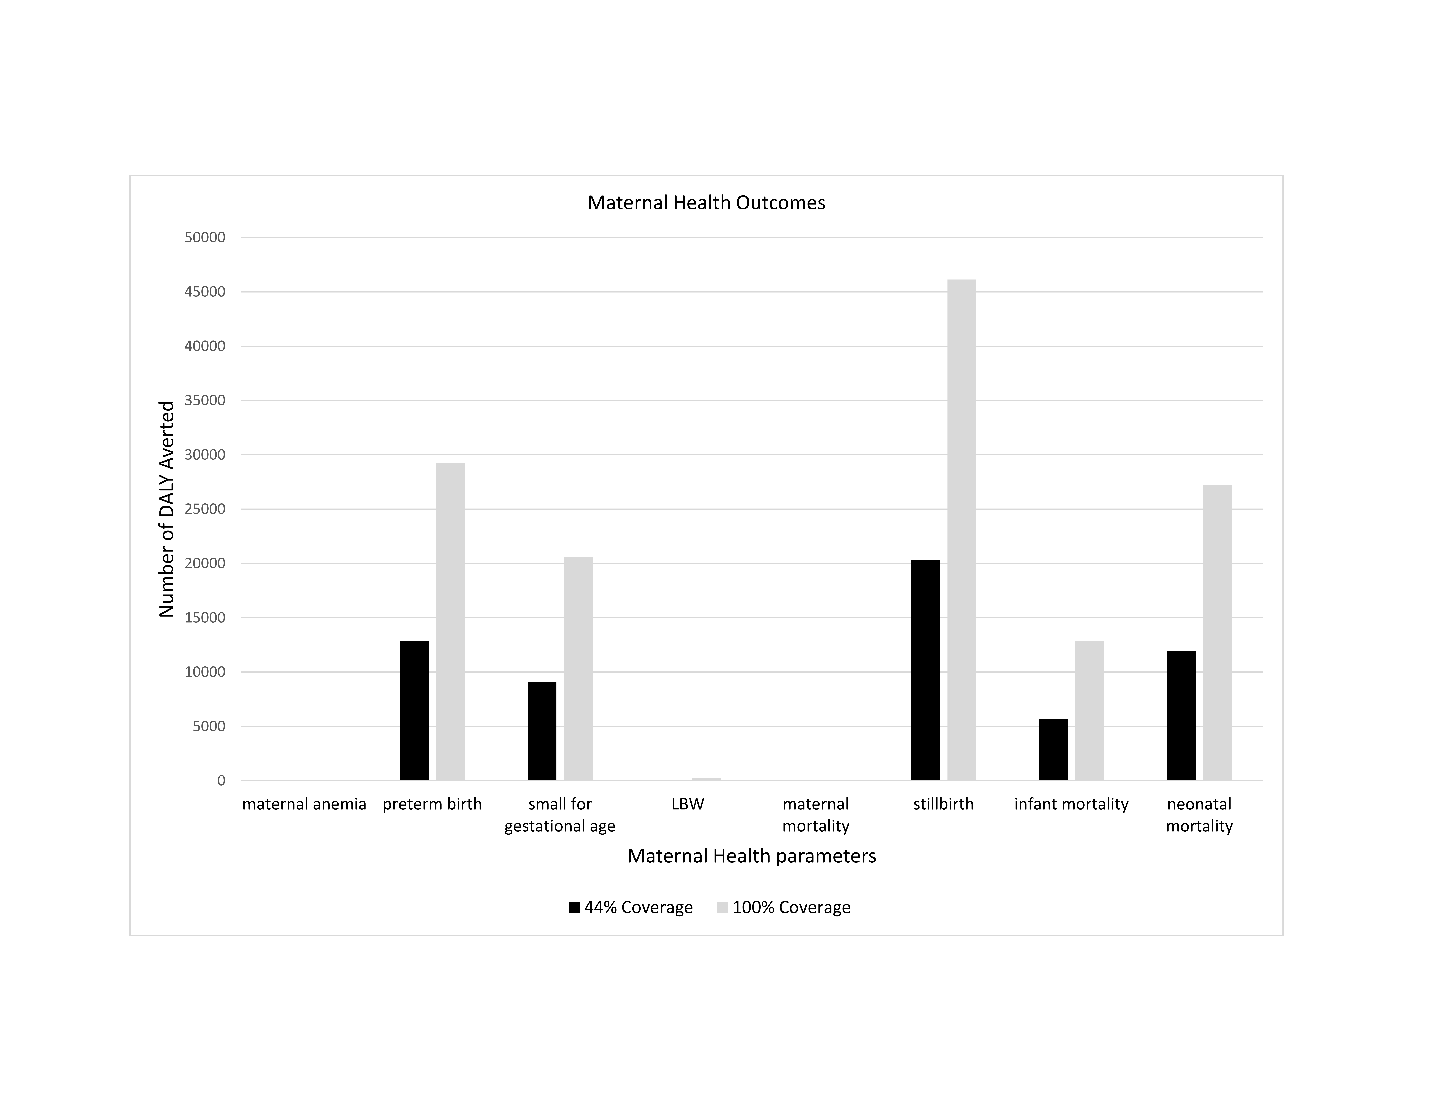
**

**Figure S1.** Maternal Health Outcomes

**
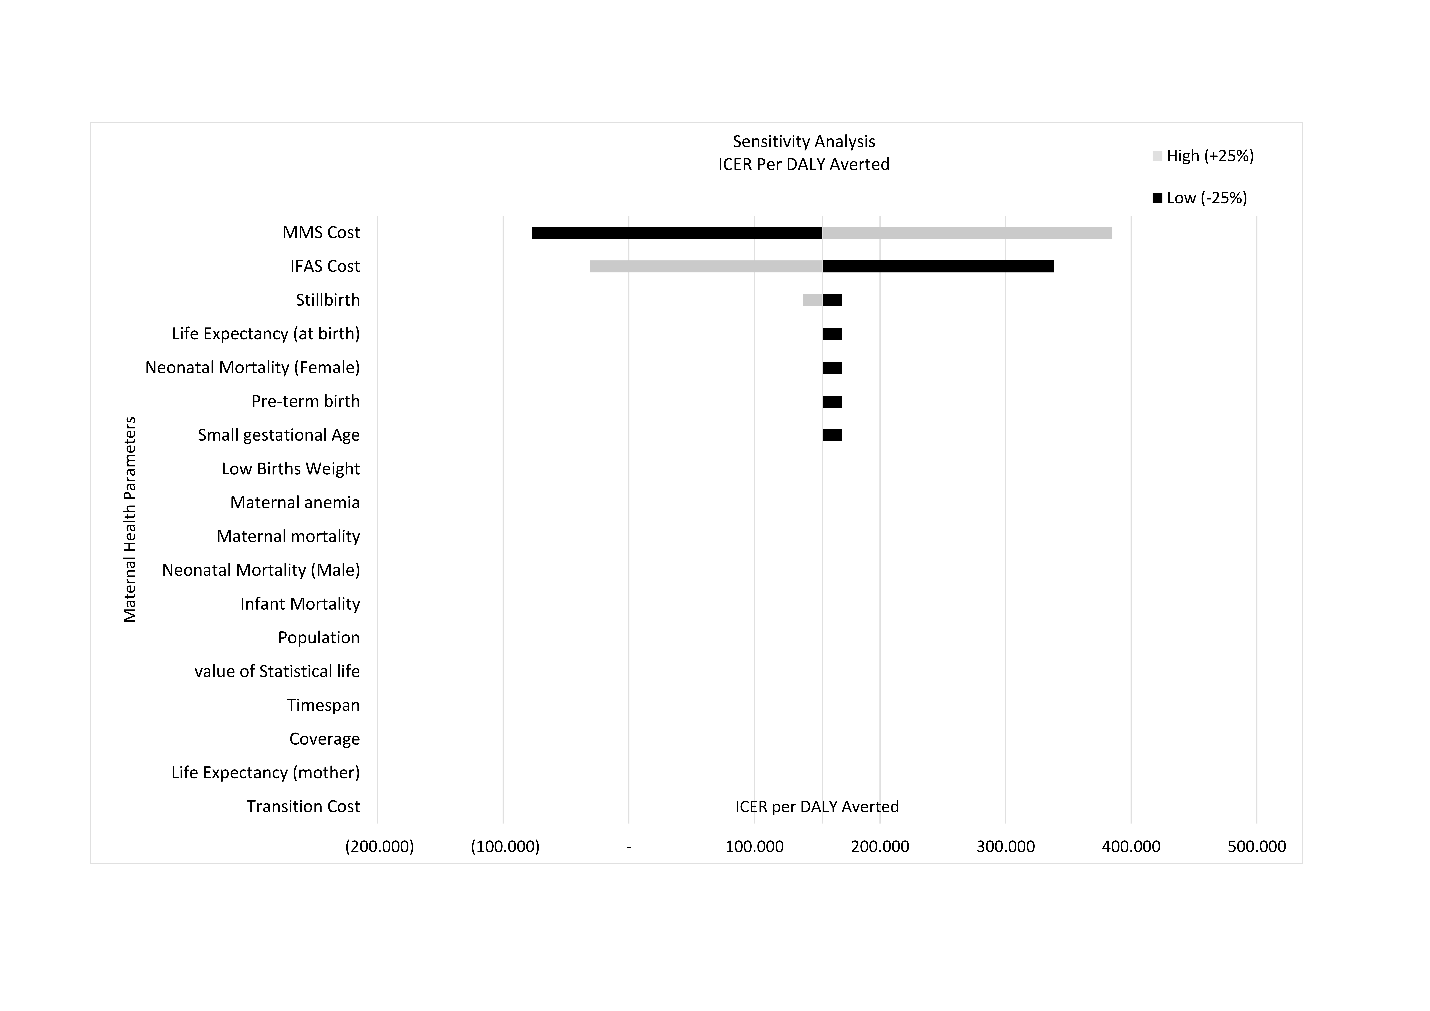
**

**Figure S2.** One-way deterministic sensitivity analysis
